# Supplementary material
Source: MDPI journal article supplement (https://www.mdpi.com/1999-4907/15/2/346)
Supplement: s1 [file s1]

**Supplementary Table S1.** PCA Autovectors

| Variable               | CP1    | CP2    | CP3    | CP4    | CP5    | CP6    | CP7    | CP8    | CP9    | CP10   |
|------------------------|--------|--------|--------|--------|--------|--------|--------|--------|--------|--------|
| Rainfall               | 0.262  | -0.102 | -0.076 | 0.003  | -0.124 | -0.386 | 0.12   | 0.362  | -0.015 | 0.163  |
| SLA                    | -0.083 | -0.373 | 0.23   | -0.002 | 0.152  | 0.07   | -0.06  | 0.336  | 0.361  | -0.033 |
| $\Psi_{\text{w (pd)}}$ | 0.218  | 0.199  | 0.283  | -0.014 | 0.022  | -0.317 | -0.229 | -0.357 | 0.273  | -0.246 |
| $\Psi_{\text{w (md)}}$ | 0.198  | 0.262  | -0.202 | 0.072  | 0.263  | 0.145  | 0.483  | -0.091 | 0.212  | 0.102  |
| $P_{\text{N}}$         | 0.247  | 0.168  | -0.004 | -0.026 | -0.097 | -0.343 | -0.169 | 0.002  | -0.502 | 0.262  |
| Daily $P_{\text{N}}$   | 0.257  | 0.131  | 0.008  | -0.145 | -0.055 | 0.021  | 0.13   | 0.049  | 0.141  | -0.207 |
| E                      | 0.268  | 0.047  | 0.092  | 0.342  | -0.219 | 0.339  | -0.356 | 0.035  | 0.177  | -0.047 |
| $g_{\text{s}}$         | 0.267  | 0.073  | 0.032  | 0.128  | -0.006 | 0.122  | -0.299 | -0.062 | 0.025  | 0.372  |
| $T_{\text{leaf}}$      | 0.254  | -0.083 | -0.237 | 0.011  | 0.23   | 0.213  | -0.194 | -0.108 | -0.264 | 0.071  |
| VPD                    | 0.27   | -0.038 | 0.027  | 0.139  | 0.212  | 0.215  | 0.088  | 0.402  | -0.068 | -0.021 |
| TLT                    | -0.177 | 0.26   | -0.347 | 0.048  | -0.305 | -0.282 | 0.061  | 0.151  | 0.292  | 0.102  |
| ADAE                   | -0.178 | 0.23   | 0.421  | -0.091 | -0.234 | 0.146  | 0.049  | 0.152  | 0.143  | 0.544  |
| ABAE                   | -0.042 | 0.403  | 0.053  | -0.105 | -0.085 | 0.281  | 0.02   | 0.424  | -0.257 | -0.138 |
| SP                     | -0.051 | -0.394 | -0.161 | 0.101  | -0.342 | 0.091  | 0.06   | 0.072  | -0.2   | -0.186 |
| MT                     | -0.185 | -0.151 | 0.526  | 0.292  | 0.04   | -0.175 | 0.19   | -0.035 | -0.312 | -0.013 |
| ML                     | 0.052  | -0.395 | -0.144 | -0.017 | 0.133  | -0.037 | -0.005 | -0.083 | 0.169  | 0.5    |
| MA                     | 0.264  | 0.015  | 0.194  | 0.175  | 0.111  | -0.215 | -0.128 | 0.238  | 0.155  | -0.148 |
| MXT                    | 0.237  | -0.193 | -0.106 | -0.033 | -0.438 | -0.116 | 0.004  | 0.14   | 0.082  | -0.099 |
| MXA                    | 0.258  | -0.097 | 0.173  | -0.007 | -0.467 | 0.288  | 0.344  | -0.35  | -0.007 | 0.031  |
| VA                     | 0.247  | -0.135 | 0.203  | -0.778 | 0.059  | 0.015  | 0.031  | 0.046  | -0.023 | -0.018 |
| NV                     | 0.269  | 0.003  | 0.099  | 0.257  | 0.13   | -0.149 | 0.455  | -0.007 | -0.044 | 0.025  |
| Kp                     | 0.009  | -0.084 | 0.018  | 0.197  | 0.196  | -0.184 | -0.474 | -0.568 | -0.068 | -0.329 |
